# Supplementary material
Source: PubMed Central journal article supplement (PMC6752939)
Supplement: ehp1229.s001.acco.pdf [file ehp1229.s001.acco.pdf]

**Note to readers with disabilities:** *EHP* strives to ensure that all journal content is accessible to all readers. However, some figures and Supplemental Material published in *EHP* articles may not conform to [508 standards](#) due to the complexity of the information being presented. If you need assistance accessing journal content, please contact [ehp508@niehs.nih.gov](mailto:ehp508@niehs.nih.gov). Our staff will work with you to assess and meet your accessibility needs within 3 working days.

### **Supplemental Material**

#### **Greenness and Depression Incidence among Older Women**

Rachel F. Banay, Peter James, Jaime E. Hart, Laura D. Kubzansky, Donna Spiegelman, Olivia I. Okereke, John D. Spengler, and Francine Laden

#### **Table of Contents**

**Table S1.** Estimated proportion of association between greenness and depression in the Nurses' Health Study explained by physical activity and social engagement (N=38,947 with 3,612 depression cases over 315,548 person-years of follow-up, 2000-2010).

**Figure S1.** Stratum-specific hazard ratios (HR) and 95% confidence intervals (CI) for the effect of residential contemporaneous summer greenness (250 m buffer) on incident depression within quintiles of population density in the Nurses' Health Study (N=38,947 with 3,612 cases over 315,548 person-years of follow-up, 2000-2010).

**Table S1.** Estimated proportion of association between greenness and depression in the Nurses' Health Study explained by physical activity and social engagement<sup>a</sup> (N=38,947 with 3,612 depression cases over 315,548 person-years of follow-up, 2000-2010)

| NDVI                            | Physical Activity                              |                                            |                     | Social Engagement                              |                                            |                     |
|---------------------------------|------------------------------------------------|--------------------------------------------|---------------------|------------------------------------------------|--------------------------------------------|---------------------|
|                                 | HR (95% CI) not adjusted for physical activity | HR (95% CI) adjusted for physical activity | Proportion Mediated | HR (95% CI) not adjusted for social engagement | HR (95% CI) adjusted for social engagement | Proportion Mediated |
| <b>250 m buffer</b>             |                                                |                                            |                     |                                                |                                            |                     |
| Quintile 1 <sup>a</sup> (<0.51) | Ref                                            | Ref                                        |                     | Ref                                            | Ref                                        |                     |
| Quintile 2 (0.51, 0.65)         | 0.98 (0.88, 1.09)                              | 0.99 (0.89, 1.10)                          | <1%                 | 0.98 (0.88, 1.09)                              | 0.98 (0.88, 1.09)                          | <1%                 |
| Quintile 3 (0.65, 0.74)         | 0.93 (0.84, 1.04)                              | 0.93 (0.84, 1.04)                          | <1%                 | 0.93 (0.84, 1.04)                              | 0.93 (0.84, 1.04)                          | <1%                 |
| Quintile 4 (0.74, 0.81)         | 0.95 (0.85, 1.06)                              | 0.95 (0.85, 1.06)                          | <1%                 | 0.95 (0.85, 1.06)                              | 0.94 (0.85, 1.06)                          | <1%                 |
| Quintile 5 (>0.81)              | 0.87 (0.78, 0.98)                              | 0.87 (0.78, 0.98)                          | <1%                 | 0.87 (0.78, 0.98)                              | 0.87 (0.78, 0.98)                          | <1%                 |
| <b>1250 m buffer</b>            |                                                |                                            |                     |                                                |                                            |                     |
| Quintile 1 <sup>a</sup> (<0.53) | Ref                                            | Ref                                        |                     | Ref                                            | Ref                                        |                     |
| Quintile 2 (0.53, 0.66)         | 0.92 (0.82, 1.03)                              | 0.92 (0.82, 1.03)                          | <1%                 | 0.92 (0.83, 1.03)                              | 0.92 (0.82, 1.03)                          | <1%                 |
| Quintile 3 (0.66, 0.73)         | 1.06 (0.95, 1.18)                              | 1.06 (0.95, 1.18)                          | <1%                 | 1.06 (0.95, 1.19)                              | 1.06 (0.95, 1.18)                          | <1%                 |
| Quintile 4 (0.73, 0.80)         | 0.94 (0.85, 1.06)                              | 0.94 (0.85, 1.06)                          | <1%                 | 0.95 (0.85, 1.06)                              | 0.94 (0.85, 1.05)                          | <1%                 |
| Quintile 5 (>0.80)              | 0.90 (0.81, 1.01)                              | 0.90 (0.81, 1.01)                          | <1%                 | 0.90 (0.81, 1.01)                              | 0.90 (0.81, 1.01)                          | <1%                 |

<sup>a</sup> Least green quintile

<sup>b</sup> Hazard ratios are adjusted for age, race, baseline mental health inventory-5 score, marital status, educational attainment, husband's educational attainment, Census tract population density, Census tract median income, Census tract median home value, PM<sub>2.5</sub> level, BMI, smoking status and pack-years of smoking, alcohol consumption, physical activity, physical function, bodily pain (baseline), social network strength, care to ill family members (baseline), difficulty sleeping (baseline) except when mediating variable

**Figure S1.** Stratum-specific hazard ratios (HR) and 95% confidence intervals (CI) for the effect of residential contemporaneous summer greenness (250 m buffer) on incident depression within quintiles of population density in the Nurses' Health Study (N=38,947 with 3,612 cases over 315,548 person-years of follow-up, 2000-2010)

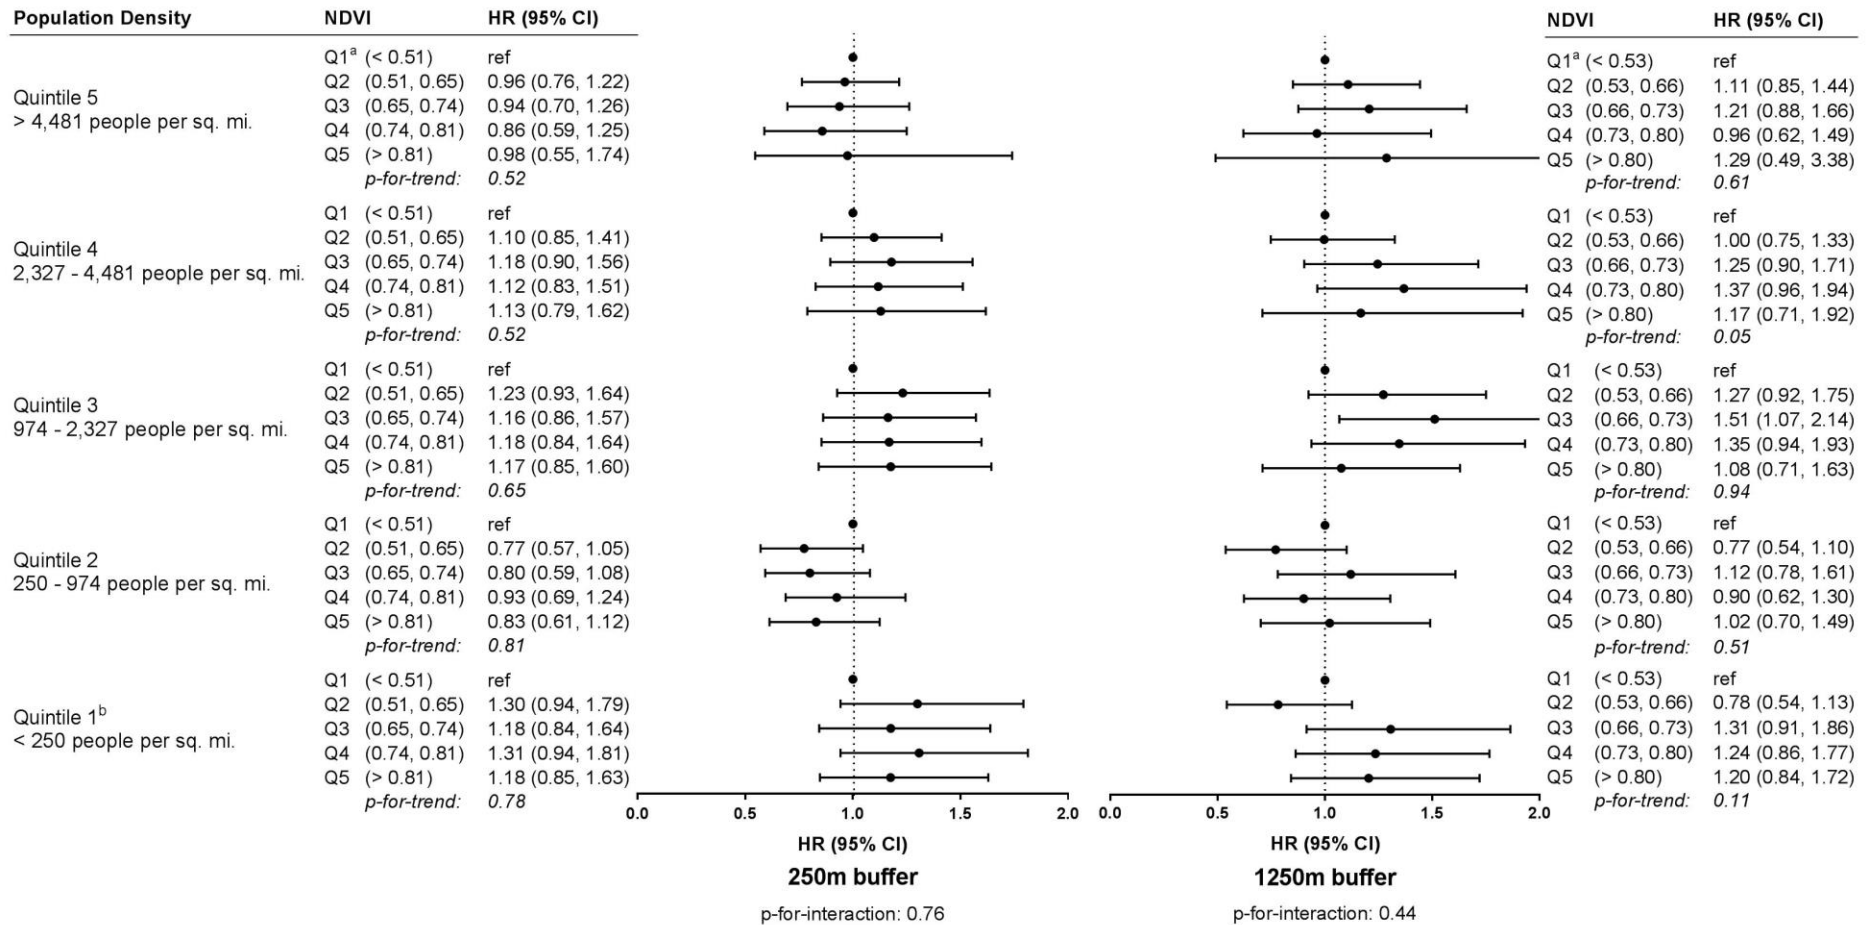

<sup>a</sup> Least green quintile

<sup>b</sup> Least dense quintile

Hazard ratios are adjusted for age, race, BMI, smoking status and pack-years of smoking, alcohol consumption, physical activity, physical function, bodily pain (baseline), marital status, social network strength, care to ill family members (baseline), difficulty sleeping (baseline), baseline mental health, educational attainment, husband's educational attainment, Census tract median income, Census tract median home value, PM<sub>2.5</sub> level
