# Supplementary material
Source: PubMed Central journal article supplement (PMC6752939)
Supplement: ehp1229.smcontents.508.pdf [file ehp1229.smcontents.508.pdf]

**Note to readers with disabilities:** *EHP* strives to ensure that all journal content is accessible to all readers. However, some figures and Supplemental Material published in *EHP* articles may not conform to [508 standards](#) due to the complexity of the information being presented. If you need assistance accessing journal content, please contact [ehp508@niehs.nih.gov](mailto:ehp508@niehs.nih.gov). Our staff will work with you to assess and meet your accessibility needs within 3 working days.

### **Supplemental Material**

#### **Greenness and Depression Incidence among Older Women**

Rachel F. Banay, Peter James, Jaime E. Hart, Laura D. Kubzansky, Donna Spiegelman, Olivia I. Okereke, John D. Spengler, and Francine Laden

#### **Table of Contents**

**Table S1.** Estimated proportion of association between greenness and depression in the Nurses' Health Study explained by physical activity and social engagement (N=38,947 with 3,612 depression cases over 315,548 person-years of follow-up, 2000-2010).

**Figure S1.** Stratum-specific hazard ratios (HR) and 95% confidence intervals (CI) for the effect of residential contemporaneous summer greenness (250 m buffer) on incident depression within quintiles of population density in the Nurses' Health Study (N=38,947 with 3,612 cases over 315,548 person-years of follow-up, 2000-2010).
